# Supplementary material for: Plutarco, dionisio y el vino
Source: Royal Society of Chemistry journal article supplement (doi:10.1039/b414470h), 2000-01-01
Supplement: b414470h.pdf [file b414470h.pdf]

# Supplementary Material (ESI) for Chemical Communications  
# This journal is © The Royal Society of Chemistry 2005

## Supporting Information

# “The Influence of Sterics on the Formation of Polar 1-D Hydrogen-Bonded Networks”

Adam J. Preston, Judith C. Gallucci and Jon R. Parquette\*

*Department of Chemistry, The Ohio State University, Columbus, OH 43210.*

[parquett@chemistry.ohio-state.edu](mailto:parquett@chemistry.ohio-state.edu)

**4-Chloro-*N,N'*-bis[(*S*)-2-chloro-1-methylethyl]pyridine-2,6-dicarboxamide.** A mixture of (*S*)-(+)-2-amino-1-propanol (1.80 g, 1.90 ml, 24.40 mmol) and methyl 4-chloropyridine-2,6-dicarboxylate (2.30 g, 10.00 mmol) was heated at 90 °C for 2 h. The mixture was diluted with CHCl<sub>3</sub> (50 ml) followed by the addition of SOCl<sub>2</sub> (7.14 g, 4.38 ml, 60.00 mmol). The reaction was heated at reflux for 1 h and concentrated under vacuum. The residue was chromatographed over silica using a 95:5 CH<sub>2</sub>Cl<sub>2</sub>:EtOAc mobile phase. Product was isolated as a white crystalline solid (3.06 g, 87 %); mp 165-167 °C (CH<sub>2</sub>Cl<sub>2</sub>); <sup>1</sup>H NMR (CDCl<sub>3</sub>) δ 1.43 (d, *J* = 6.7 Hz, 6H), 3.73 (dd, *J* = 3.2, 11.1 Hz, 2H), 3.86 (dd, *J* = 4.0, 11.1 Hz, 2H), 4.59 (m, 2H), 7.91 (d, *J* = 8.1 Hz, 2H), 8.33 (s, 2H); <sup>13</sup>C NMR (CDCl<sub>3</sub>) δ 18.03, 45.44, 49.60, 125.41, 148.03, 149.87, 161.48; HRMS *m/z* [Na]<sup>+</sup> 374.0206 (calcd for C<sub>13</sub>H<sub>16</sub>Cl<sub>3</sub>N<sub>3</sub>O<sub>2</sub>Na<sup>+</sup> 374.0200).

**4-Chloro-2,6-bis-[(*S*)-4-methyloxazolin-2-yl]pyridine.** To a suspension of NaH (1.38 g, 34.47 mmol) in THF (76 ml) was slowly added a solution of 4-chloro-*N,N'*-bis[(*S*)-2-chloro-1-methylethyl]pyridine-2,6-dicarboxamide (3.04 g, 8.62 mmol) in THF (10 ml). The reaction was stirred for 1 h, filtered, and concentrated. Residue was chromatographed over silica using 50:50 CH<sub>2</sub>Cl<sub>2</sub>:EtOAc. Product was isolated as a white solid (1.71 g, 71 %); mp 112-114 °C (CH<sub>2</sub>Cl<sub>2</sub>); <sup>1</sup>H NMR (CDCl<sub>3</sub>) δ 1.39 (d, *J* = 6.6 Hz, 6H), 4.09 (t, *J* = 8.1 Hz, 2H), 4.46 (m, 2H), 4.63 (t, *J* = 8.3 Hz, 2H), 8.21 (s, 2H); <sup>13</sup>C NMR (CDCl<sub>3</sub>) δ 21.27, 62.32, 74.97, 125.83, 145.48, 148.08, 161.48; HRMS *m/z* [Na]<sup>+</sup> 302.0682 (calcd for C<sub>13</sub>H<sub>14</sub>Cl<sub>1</sub>N<sub>3</sub>O<sub>2</sub>Na<sup>+</sup> 302.0667).

**4-Amino-2,6-bis-[(*S*)-4-methyloxazolin-2-yl]pyridine.** To a solution of 4-chloro-2,6-bis-[(*S*)-4-methyloxazolin-2-yl]pyridine (1.71 g, 6.12 mmol) in DMF (30 ml) was added NaN<sub>3</sub> (3.98 g, 61.20 mmol). The reaction was heated to 65 °C for 3 h. The DMF was removed under vacuum and the residue dissolved in CH<sub>2</sub>Cl<sub>2</sub>, filtered and re-concentrated. The resulting residue was dissolved in isopropanol (31 ml) to which NaBH<sub>4</sub> (0.23 g, 6.16 mmol) was added. The reaction was heated to reflux for 2 h, cooled to r.t., and diluted with 0.15 M NaOH (50 ml). The resulting mixture was washed with CH<sub>2</sub>Cl<sub>2</sub> (3 x 50 ml) and the organic layers combined, dried over MgSO<sub>4</sub>, filtered, and concentrated to a yellow crystalline solid (1.58 g, 99 %); mp (dec) 250 °C (CH<sub>2</sub>Cl<sub>2</sub>); <sup>1</sup>H NMR (DMSO) δ 1.23 (d, *J* = 6.6 Hz, 6H), 3.91 (t, *J* = 8.0 Hz, 2H), 4.28 (m, 2H),

# Supplementary Material (ESI) for Chemical Communications  
# This journal is © The Royal Society of Chemistry 2005

4.47 (t,  $J = 8.3$  Hz, 2H), 6.57 (s, 2H), 7.22 (s, 2H);  $^{13}\text{C}$  NMR (DMSO)  $\delta$  21.25, 61.40, 73.55, 109.97, 146.68, 155.14, 162.05; HRMS (EI)  $m/z$  260.1273 (calcd for  $\text{C}_{13}\text{H}_{16}\text{N}_4\text{O}_2^+$  260.1268).

**4-Chloro-*N,N'*-bis[(*S*)-2-chloro-1-isopropylethyl]pyridine-2,6-dicarboxamide.** A mixture of (*S*)-(+)-2-amino-3-methyl-1-butanol (0.49 g, 4.76 mmol) and dimethyl 4-chloropyridine-2,6-dicarboxylate (0.46 g, 2.00 mmol) was heated at 100 °C for 2 h. The mixture was diluted with  $\text{CHCl}_3$  (10 ml) followed by the addition of  $\text{SOCl}_2$  (1.43 g, 875  $\mu\text{l}$ , 12.00 mmol). The reaction was heated to reflux for 2 h and concentrated under vacuum. The residue was chromatographed over silica using a 98:2  $\text{CH}_2\text{Cl}_2$ :EtOAc mobile phase. Product was isolated as a white crystalline solid (0.79 g, 96 %); mp 130-132 °C ( $\text{CH}_2\text{Cl}_2$ );  $^1\text{H}$  NMR ( $\text{CDCl}_3$ )  $\delta$  1.03 (d, 6.8 Hz, 6H), 1.07 (d,  $J = 6.7$  Hz, 6H), 2.11 (oct,  $J = 6.8$  Hz, 2H), 3.77 (dd,  $J = 3.9, 11.4$  Hz, 2H), 3.89 (dd,  $J = 3.4, 11.4$  Hz, 2H), 4.17 (m, 2H), 7.92 (d,  $J = 9.4$ , 2H), 8.35 (s, 2H);  $^{13}\text{C}$  NMR ( $\text{CDCl}_3$ )  $\delta$  18.81, 19.35, 29.65, 46.82, 54.97, 125.56, 148.14, 149.91, 161.91; HRMS  $m/z$   $[\text{Na}]^+$  430.0815 (calcd for  $\text{C}_{17}\text{H}_{24}\text{Cl}_3\text{N}_3\text{O}_2\text{Na}^+$  430.0826).

**4-Chloro-2,6-bis-[(*S*)-4-isopropylloxazolin-2-yl]pyridine.** To a suspension of NaH (0.16 g, 4.00 mmol) in THF (2 ml) was slowly added a solution of 4-chloro-*N,N'*-bis[(*S*)-2-chloro-1-isopropylethyl]pyridine-2,6-dicarboxamide (0.41 g, 1.00 mmol) in THF (3 ml). The reaction was stirred for 4 h, filtered, and concentrated. Residue was chromatographed over silica using 70:30 hexanes:EtOAc. Product was isolated as a white solid (0.29 g, 86 %); mp 55-57 °C ( $\text{CH}_2\text{Cl}_2$ );  $^1\text{H}$  NMR ( $\text{CDCl}_3$ )  $\delta$  0.91 (d, 6.8 Hz, 6H), 1.01 (d,  $J = 6.4$  Hz, 6H), 1.83 (oct,  $J = 6.8$  Hz, 2H), 4.11 (m, 2H), 4.20 (t,  $J = 8.8$  Hz, 2H), 4.50 (t,  $J = 8.4$  Hz, 2H), 8.19 (s, 2H);  $^{13}\text{C}$  NMR ( $\text{CDCl}_3$ )  $\delta$  18.21, 18.88, 32.71, 71.12, 72.85, 125.73, 145.17, 148.04, 161.30; HRMS  $m/z$   $[\text{Na}]^+$  358.1317 (calcd for  $\text{C}_{17}\text{H}_{22}\text{Cl}_1\text{N}_3\text{O}_2\text{Na}^+$  358.1293).

**4-Amino-2,6-bis-[(*S*)-4-isopropylloxazolin-2-yl]pyridine.** To a solution of 4-chloro-2,6-bis-[(*S*)-4-isopropylloxazolin-2-yl]pyridine (0.10 g, 0.30 mmol) in DMF (1.5 ml) was added  $\text{NaN}_3$  (0.19 g, 2.98 mmol). The reaction was heated to 65 °C for 15 h. The DMF was removed under vacuum and the residue dissolved in  $\text{CH}_2\text{Cl}_2$ , filtered and re-concentrated. The resulting residue was dissolved in isopropanol (1.0 ml) to which  $\text{NaBH}_4$  (0.011 g, 0.30 mmol) was added. The

# Supplementary Material (ESI) for Chemical Communications  
# This journal is © The Royal Society of Chemistry 2005

reaction was heated to reflux for 2 h, cooled to r.t., and diluted with 0.1 M NaOH (10 ml). The resulting mixture was washed with CH<sub>2</sub>Cl<sub>2</sub> (3 x 10 ml) and the organic layers combined, dried over MgSO<sub>4</sub>, filtered, and concentrated to a yellow crystalline solid (0.055 g, 87 %); mp dec 230 °C (CH<sub>2</sub>Cl<sub>2</sub>); <sup>1</sup>H NMR (DMSO) δ 0.87 (d, 6.8 Hz, 6H), 0.94 (d, *J* = 6.8 Hz, 6H), 1.74 (oct, *J* = 6.4 Hz, 2H), 4.03 (m, 2H), 4.09 (t, *J* = 8.4 Hz, 2H), 4.40 (t, *J* = 8.6 Hz, 2H), 6.45 (s, 2H), 7.27 (s, 2H); <sup>13</sup>C NMR (DMSO) δ 18.22, 18.52, 32.22, 69.82, 71.87, 110.04, 146.67, 155.12, 162.23; HRMS *m/z* [Na]<sup>+</sup> 339.1792 (calcd for C<sub>17</sub>H<sub>24</sub>N<sub>4</sub>O<sub>2</sub>Na<sup>+</sup> 339.1791).

# Supplementary Material (ESI) for Chemical Communications  
# This journal is © The Royal Society of Chemistry 2005

### **Crystal Data for Ampybox 1.**

The data collection crystal was a clear, colorless rectangular rod. Examination of the diffraction pattern on a Nonius Kappa CCD diffractometer indicated an orthorhombic crystal system. All work was done at 200 K using an Oxford Cryosystems Cryostream Cooler. The data collection strategy was set up to measure an octant of reciprocal space with a redundancy factor of 4.9, which means that 90% of the reflections were measured at least 4.9 times. A combination of phi and omega scans with a frame width of 1.0° was used. Data integration was done with Denzo(1), and scaling and merging of the data was done with Scalepack(1). Merging the data and averaging the symmetry equivalent reflections resulted in an Rint value of 0.042.

The structure was solved by the direct methods procedure in SHELXD(2). There are 2.5 molecules in the asymmetric unit. Two molecules are in general positions (labeled as A and B), while one molecule contains a crystallographic two-fold axis (labeled as C). The correct enantiomer was chosen based on the known chiral centers. Full-matrix least-squares refinements based on  $F^2$  were performed in SHELXL-97(3), as incorporated in the WinGX package(4).

The hydrogen atoms bonded to the nitrogen atoms were refined isotropically. For the methyl groups, the hydrogen atoms were added at calculated positions using a riding model with  $U(H) = 1.5 * U_{eq}(\text{bonded carbon atom})$ . The torsion angle, which defines the orientation of the methyl group about the C-C bond, was refined. The remaining hydrogen atoms were included in the model at calculated positions using a riding model with  $U(H) = 1.2 * U_{eq}(\text{attached atom})$ . The final refinement cycle was based on all 3345 intensities and 455 variables and resulted in agreement factors of  $R1(F) = 0.055$  and  $wR2(F^2) = 0.096$ . For the subset of data with  $I > 2 * \sigma(I)$ , the  $R1(F)$  value is 0.038 for 2628 reflections. The final difference electron density map contains maximum and minimum peak heights of 0.23 and -0.16 e/ Å<sup>3</sup>. Neutral atom scattering factors were used and include terms for anomalous dispersion(5).

**Crystallographic details.**

|                                 |                                                           |
|---------------------------------|-----------------------------------------------------------|
| Empirical formula               | C13 H16 N4 O2                                             |
| Formula weight                  | 260.30                                                    |
| Temperature                     | 200(2) K                                                  |
| Wavelength                      | 0.71073                                                   |
| Crystal system                  | Orthorhombic                                              |
| Space group                     | P 2 <sub>1</sub> 2 <sub>1</sub> 2                         |
| Unit cell dimensions            | a = 32.0792(5) Å<br>b = 14.4080(2) Å<br>c = 7.20350(10) Å |
| Volume                          | 3329.44(8) Å <sup>3</sup>                                 |
| Z                               | 10                                                        |
| Calculated density              | 1.298 Mg/m <sup>3</sup>                                   |
| Absorption coefficient          | 0.091 mm <sup>-1</sup>                                    |
| F(000)                          | 1380                                                      |
| Crystal size                    | 0.42 x 0.17 x 0.15 mm                                     |
| Theta range for data collection | 2.37 to 25.01 deg.                                        |
| Limiting indices                | -38<=h<=37, -17<=k<=17, -8<=l<=8                          |
| Reflections collected / unique  | 34401 / 3345 [R(int) = 0.042]                             |
| Completeness to theta = 25.01   | 99.6%                                                     |
| Refinement method               | Full-matrix least-squares on F <sup>2</sup>               |
| Data / restraints / parameters  | 3345 / 0 / 455                                            |

# Supplementary Material (ESI) for Chemical Communications  
# This journal is © The Royal Society of Chemistry 2005

|                                      |                                   |
|--------------------------------------|-----------------------------------|
| Goodness-of-fit on $F^2$             | 1.045                             |
| Final R indices [ $I > 2\sigma(I)$ ] | R1 = 0.0380, wR2 = 0.0877         |
| R indices (all data)                 | R1 = 0.0554, wR2 = 0.0960         |
| Largest diff. peak and hole          | 0.228 and -0.161 e/Å <sup>3</sup> |

Atomic coordinates ( $\times 10^4$ ) and equivalent isotropic displacement parameters ( $\text{Å}^2 \times 10^3$ ) for Parquette 1274.  
U(eq) is defined as one third of the trace of the orthogonalized Uij tensor.

---

|        | x       | y       | z        | U(eq) |
|--------|---------|---------|----------|-------|
| C(1A)  | 7981(1) | 5007(2) | 8045(3)  | 35(1) |
| C(1B)  | 6013(1) | 4952(2) | 9344(3)  | 33(1) |
| C(1C)  | 5000    | 10000   | 1200(4)  | 31(1) |
| C(2A)  | 7665(1) | 4571(2) | 7016(3)  | 34(1) |
| C(2B)  | 5687(1) | 4558(2) | 8313(3)  | 34(1) |
| C(2C)  | 5328(1) | 9614(2) | 2224(3)  | 31(1) |
| C(3A)  | 7683(1) | 4580(1) | 5102(3)  | 29(1) |
| C(3B)  | 5703(1) | 4558(1) | 6406(3)  | 29(1) |
| C(3C)  | 5309(1) | 9616(1) | 4131(3)  | 27(1) |
| C(4A)  | 8283(1) | 5432(1) | 5115(3)  | 30(1) |
| C(4B)  | 6318(1) | 5345(2) | 6394(3)  | 29(1) |
| C(4C)  | 5645(1) | 9164(1) | 5231(3)  | 28(1) |
| C(5A)  | 8294(1) | 5441(2) | 7026(3)  | 34(1) |
| C(5B)  | 6337(1) | 5347(2) | 8311(3)  | 33(1) |
| C(5C)  | 6212(1) | 8279(2) | 5506(3)  | 41(1) |
| C(6A)  | 7358(1) | 4096(2) | 4002(3)  | 29(1) |
| C(6B)  | 5363(1) | 4116(2) | 5320(3)  | 32(1) |
| C(6C)  | 6065(1) | 8623(2) | 7408(3)  | 39(1) |
| C(7A)  | 6776(1) | 3260(2) | 3687(4)  | 43(1) |
| C(7B)  | 4777(1) | 3294(2) | 5062(4)  | 49(1) |
| C(7C)  | 5972(1) | 7846(2) | 8766(4)  | 57(1) |
| C(8A)  | 6972(1) | 3464(2) | 1797(4)  | 41(1) |
| C(8B)  | 4933(1) | 3600(2) | 3163(4)  | 48(1) |
| C(9A)  | 7114(1) | 2617(2) | 726(4)   | 53(1) |
| C(9B)  | 4989(1) | 2802(2) | 1806(4)  | 74(1) |
| C(10A) | 8616(1) | 5896(2) | 4033(3)  | 31(1) |
| C(10B) | 6645(1) | 5818(1) | 5296(3)  | 29(1) |
| C(11A) | 9207(1) | 6702(2) | 3767(4)  | 52(1) |
| C(11B) | 7194(1) | 6762(2) | 4982(4)  | 41(1) |
| C(12A) | 9035(1) | 6449(2) | 1845(4)  | 45(1) |
| C(12B) | 7042(1) | 6422(2) | 3082(4)  | 38(1) |
| C(13A) | 8971(1) | 7278(2) | 599(4)   | 72(1) |
| C(13B) | 6895(1) | 7190(2) | 1796(4)  | 49(1) |
| N(1A)  | 7979(1) | 5008(2) | 9918(3)  | 49(1) |
| N(1B)  | 6014(1) | 4941(2) | 11210(3) | 49(1) |

---



# Supplementary Material (ESI) for Chemical Communications  
# This journal is © The Royal Society of Chemistry 2005

|       |         |         |         |       |
|-------|---------|---------|---------|-------|
| N(1C) | 5000    | 10000   | -677(4) | 45(1) |
| N(2A) | 7984(1) | 5006(1) | 4095(2) | 31(1) |
| N(2B) | 6012(1) | 4945(1) | 5401(2) | 30(1) |
| N(2C) | 5000    | 10000   | 5139(3) | 28(1) |
| N(3A) | 7335(1) | 4057(1) | 2253(3) | 36(1) |
| N(3B) | 5334(1) | 4071(1) | 3578(3) | 40(1) |
| N(3C) | 5684(1) | 9161(1) | 6971(3) | 36(1) |
| N(4A) | 8638(1) | 5967(1) | 2281(3) | 37(1) |
| N(4B) | 6688(1) | 5800(1) | 3558(3) | 36(1) |
| O(1A) | 7066(1) | 3642(1) | 5028(2) | 40(1) |
| O(1B) | 5056(1) | 3730(1) | 6362(2) | 47(1) |
| O(1C) | 5933(1) | 8701(1) | 4188(2) | 43(1) |
| O(2A) | 8927(1) | 6268(1) | 5077(3) | 45(1) |
| O(2B) | 6913(1) | 6346(1) | 6313(2) | 41(1) |

---

Bond lengths [Å] and angles [deg] for Parquette 1274

---

|               |          |
|---------------|----------|
| C(1A)-N(1A)   | 1.349(3) |
| C(1A)-C(5A)   | 1.393(3) |
| C(1A)-C(2A)   | 1.404(3) |
| C(1B)-N(1B)   | 1.344(3) |
| C(1B)-C(5B)   | 1.399(3) |
| C(1B)-C(2B)   | 1.403(3) |
| C(1C)-N(1C)   | 1.352(4) |
| C(1C)-C(2C)#1 | 1.400(3) |
| C(1C)-C(2C)   | 1.400(3) |
| C(2A)-C(3A)   | 1.380(3) |
| C(2A)-H(2A)   | 0.9500   |
| C(2B)-C(3B)   | 1.375(3) |
| C(2B)-H(2B)   | 0.9500   |
| C(2C)-C(3C)   | 1.376(3) |
| C(2C)-H(2C)   | 0.9500   |
| C(3A)-N(2A)   | 1.354(3) |
| C(3A)-C(6A)   | 1.483(3) |
| C(3B)-N(2B)   | 1.349(3) |
| C(3B)-C(6B)   | 1.484(3) |
| C(3C)-N(2C)   | 1.348(2) |
| C(3C)-C(4C)   | 1.486(3) |
| C(4A)-N(2A)   | 1.355(3) |
| C(4A)-C(5A)   | 1.377(3) |
| C(4A)-C(10A)  | 1.482(3) |
| C(4B)-N(2B)   | 1.345(3) |
| C(4B)-C(5B)   | 1.382(3) |
| C(4B)-C(10B)  | 1.478(3) |
| C(4C)-N(3C)   | 1.260(3) |
| C(4C)-O(1C)   | 1.365(2) |
| C(5A)-H(5A)   | 0.9500   |
| C(5B)-H(5B)   | 0.9500   |
| C(5C)-O(1C)   | 1.441(3) |
| C(5C)-C(6C)   | 1.532(4) |
| C(5C)-H(5C1)  | 0.9900   |
| C(5C)-H(5C2)  | 0.9900   |
| C(6A)-N(3A)   | 1.263(3) |
| C(6A)-O(1A)   | 1.360(3) |
| C(6B)-N(3B)   | 1.260(3) |
| C(6B)-O(1B)   | 1.358(2) |
| C(6C)-N(3C)   | 1.483(3) |
| C(6C)-C(7C)   | 1.517(3) |
| C(6C)-H(6C)   | 1.0000   |

# Supplementary Material (ESI) for Chemical Communications  
# This journal is © The Royal Society of Chemistry 2005

|               |          |
|---------------|----------|
| C(7A)-O(1A)   | 1.450(3) |
| C(7A)-C(8A)   | 1.529(4) |
| C(7A)-H(7A1)  | 0.9900   |
| C(7A)-H(7A2)  | 0.9900   |
| C(7B)-O(1B)   | 1.439(3) |
| C(7B)-C(8B)   | 1.522(4) |
| C(7B)-H(7B1)  | 0.9900   |
| C(7B)-H(7B2)  | 0.9900   |
| C(7C)-H(7C1)  | 0.9800   |
| C(7C)-H(7C2)  | 0.9800   |
| C(7C)-H(7C3)  | 0.9800   |
| C(8A)-N(3A)   | 1.481(3) |
| C(8A)-C(9A)   | 1.513(3) |
| C(8A)-H(8A)   | 1.0000   |
| C(8B)-N(3B)   | 1.485(3) |
| C(8B)-C(9B)   | 1.520(3) |
| C(8B)-H(8B)   | 1.0000   |
| C(9A)-H(9A1)  | 0.9800   |
| C(9A)-H(9A2)  | 0.9800   |
| C(9A)-H(9A3)  | 0.9800   |
| C(9B)-H(9B1)  | 0.9800   |
| C(9B)-H(9B2)  | 0.9800   |
| C(9B)-H(9B3)  | 0.9800   |
| C(10A)-N(4A)  | 1.268(3) |
| C(10A)-O(2A)  | 1.361(3) |
| C(10B)-N(4B)  | 1.261(3) |
| C(10B)-O(2B)  | 1.363(2) |
| C(11A)-O(2A)  | 1.445(3) |
| C(11A)-C(12A) | 1.535(4) |
| C(11A)-H(11A) | 0.9900   |
| C(11A)-H(11B) | 0.9900   |
| C(11B)-O(2B)  | 1.446(3) |
| C(11B)-C(12B) | 1.534(4) |
| C(11B)-H(11C) | 0.9900   |
| C(11B)-H(11D) | 0.9900   |
| C(12A)-N(4A)  | 1.484(3) |
| C(12A)-C(13A) | 1.508(4) |
| C(12A)-H(12A) | 1.0000   |
| C(12B)-N(4B)  | 1.486(3) |
| C(12B)-C(13B) | 1.518(3) |
| C(12B)-H(12B) | 1.0000   |
| C(13A)-H(13A) | 0.9800   |
| C(13A)-H(13B) | 0.9800   |
| C(13A)-H(13C) | 0.9800   |
| C(13B)-H(13D) | 0.9800   |
| C(13B)-H(13E) | 0.9800   |

# Supplementary Material (ESI) for Chemical Communications  
# This journal is © The Royal Society of Chemistry 2005

|                     |            |
|---------------------|------------|
| C(13B)-H(13F)       | 0.9800     |
| N(1A)-H(1A1)        | 0.93(3)    |
| N(1A)-H(1A2)        | 1.01(2)    |
| N(1B)-H(1B1)        | 0.97(3)    |
| N(1B)-H(1B2)        | 1.04(2)    |
| N(1C)-H(1C1)        | 0.95(2)    |
| N(2C)-C(3C)#1       | 1.348(2)   |
|                     |            |
| N(1A)-C(1A)-C(5A)   | 122.0(2)   |
| N(1A)-C(1A)-C(2A)   | 121.7(2)   |
| C(5A)-C(1A)-C(2A)   | 116.3(2)   |
| N(1B)-C(1B)-C(5B)   | 122.4(2)   |
| N(1B)-C(1B)-C(2B)   | 121.7(2)   |
| C(5B)-C(1B)-C(2B)   | 115.9(2)   |
| N(1C)-C(1C)-C(2C)#1 | 121.78(13) |
| N(1C)-C(1C)-C(2C)   | 121.78(13) |
| C(2C)#1-C(1C)-C(2C) | 116.4(3)   |
| C(3A)-C(2A)-C(1A)   | 119.5(2)   |
| C(3A)-C(2A)-H(2A)   | 120.2      |
| C(1A)-C(2A)-H(2A)   | 120.2      |
| C(3B)-C(2B)-C(1B)   | 120.0(2)   |
| C(3B)-C(2B)-H(2B)   | 120.0      |
| C(1B)-C(2B)-H(2B)   | 120.0      |
| C(3C)-C(2C)-C(1C)   | 119.5(2)   |
| C(3C)-C(2C)-H(2C)   | 120.3      |
| C(1C)-C(2C)-H(2C)   | 120.3      |
| N(2A)-C(3A)-C(2A)   | 124.7(2)   |
| N(2A)-C(3A)-C(6A)   | 115.3(2)   |
| C(2A)-C(3A)-C(6A)   | 120.0(2)   |
| N(2B)-C(3B)-C(2B)   | 124.3(2)   |
| N(2B)-C(3B)-C(6B)   | 115.71(19) |
| C(2B)-C(3B)-C(6B)   | 120.0(2)   |
| N(2C)-C(3C)-C(2C)   | 124.8(2)   |
| N(2C)-C(3C)-C(4C)   | 115.2(2)   |
| C(2C)-C(3C)-C(4C)   | 120.0(2)   |
| N(2A)-C(4A)-C(5A)   | 124.5(2)   |
| N(2A)-C(4A)-C(10A)  | 115.4(2)   |
| C(5A)-C(4A)-C(10A)  | 120.1(2)   |
| N(2B)-C(4B)-C(5B)   | 124.3(2)   |
| N(2B)-C(4B)-C(10B)  | 115.50(19) |
| C(5B)-C(4B)-C(10B)  | 120.2(2)   |
| N(3C)-C(4C)-O(1C)   | 118.6(2)   |
| N(3C)-C(4C)-C(3C)   | 127.1(2)   |
| O(1C)-C(4C)-C(3C)   | 114.3(2)   |
| C(4A)-C(5A)-C(1A)   | 120.2(2)   |
| C(4A)-C(5A)-H(5A)   | 119.9      |

# Supplementary Material (ESI) for Chemical Communications  
# This journal is © The Royal Society of Chemistry 2005

|                     |            |
|---------------------|------------|
| C(1A)-C(5A)-H(5A)   | 119.9      |
| C(4B)-C(5B)-C(1B)   | 119.9(2)   |
| C(4B)-C(5B)-H(5B)   | 120.0      |
| C(1B)-C(5B)-H(5B)   | 120.0      |
| O(1C)-C(5C)-C(6C)   | 105.16(16) |
| O(1C)-C(5C)-H(5C1)  | 110.7      |
| C(6C)-C(5C)-H(5C1)  | 110.7      |
| O(1C)-C(5C)-H(5C2)  | 110.7      |
| C(6C)-C(5C)-H(5C2)  | 110.7      |
| H(5C1)-C(5C)-H(5C2) | 108.8      |
| N(3A)-C(6A)-O(1A)   | 118.7(2)   |
| N(3A)-C(6A)-C(3A)   | 126.5(2)   |
| O(1A)-C(6A)-C(3A)   | 114.8(2)   |
| N(3B)-C(6B)-O(1B)   | 118.3(2)   |
| N(3B)-C(6B)-C(3B)   | 127.0(2)   |
| O(1B)-C(6B)-C(3B)   | 114.61(19) |
| N(3C)-C(6C)-C(7C)   | 111.2(2)   |
| N(3C)-C(6C)-C(5C)   | 103.48(18) |
| C(7C)-C(6C)-C(5C)   | 113.5(2)   |
| N(3C)-C(6C)-H(6C)   | 109.5      |
| C(7C)-C(6C)-H(6C)   | 109.5      |
| C(5C)-C(6C)-H(6C)   | 109.5      |
| O(1A)-C(7A)-C(8A)   | 104.84(17) |
| O(1A)-C(7A)-H(7A1)  | 110.8      |
| C(8A)-C(7A)-H(7A1)  | 110.8      |
| O(1A)-C(7A)-H(7A2)  | 110.8      |
| C(8A)-C(7A)-H(7A2)  | 110.8      |
| H(7A1)-C(7A)-H(7A2) | 108.9      |
| O(1B)-C(7B)-C(8B)   | 104.74(17) |
| O(1B)-C(7B)-H(7B1)  | 110.8      |
| C(8B)-C(7B)-H(7B1)  | 110.8      |
| O(1B)-C(7B)-H(7B2)  | 110.8      |
| C(8B)-C(7B)-H(7B2)  | 110.8      |
| H(7B1)-C(7B)-H(7B2) | 108.9      |
| C(6C)-C(7C)-H(7C1)  | 109.5      |
| C(6C)-C(7C)-H(7C2)  | 109.5      |
| H(7C1)-C(7C)-H(7C2) | 109.5      |
| C(6C)-C(7C)-H(7C3)  | 109.5      |
| H(7C1)-C(7C)-H(7C3) | 109.5      |
| H(7C2)-C(7C)-H(7C3) | 109.5      |
| N(3A)-C(8A)-C(9A)   | 110.07(19) |
| N(3A)-C(8A)-C(7A)   | 103.7(2)   |
| C(9A)-C(8A)-C(7A)   | 115.0(2)   |
| N(3A)-C(8A)-H(8A)   | 109.3      |
| C(9A)-C(8A)-H(8A)   | 109.3      |
| C(7A)-C(8A)-H(8A)   | 109.3      |

# Supplementary Material (ESI) for Chemical Communications  
# This journal is © The Royal Society of Chemistry 2005

|                      |            |
|----------------------|------------|
| N(3B)-C(8B)-C(9B)    | 111.9(2)   |
| N(3B)-C(8B)-C(7B)    | 103.6(2)   |
| C(9B)-C(8B)-C(7B)    | 113.4(2)   |
| N(3B)-C(8B)-H(8B)    | 109.3      |
| C(9B)-C(8B)-H(8B)    | 109.3      |
| C(7B)-C(8B)-H(8B)    | 109.3      |
| C(8A)-C(9A)-H(9A1)   | 109.5      |
| C(8A)-C(9A)-H(9A2)   | 109.5      |
| H(9A1)-C(9A)-H(9A2)  | 109.5      |
| C(8A)-C(9A)-H(9A3)   | 109.5      |
| H(9A1)-C(9A)-H(9A3)  | 109.5      |
| H(9A2)-C(9A)-H(9A3)  | 109.5      |
| C(8B)-C(9B)-H(9B1)   | 109.5      |
| C(8B)-C(9B)-H(9B2)   | 109.5      |
| H(9B1)-C(9B)-H(9B2)  | 109.5      |
| C(8B)-C(9B)-H(9B3)   | 109.5      |
| H(9B1)-C(9B)-H(9B3)  | 109.5      |
| H(9B2)-C(9B)-H(9B3)  | 109.5      |
| N(4A)-C(10A)-O(2A)   | 118.5(2)   |
| N(4A)-C(10A)-C(4A)   | 126.9(2)   |
| O(2A)-C(10A)-C(4A)   | 114.6(2)   |
| N(4B)-C(10B)-O(2B)   | 118.4(2)   |
| N(4B)-C(10B)-C(4B)   | 126.9(2)   |
| O(2B)-C(10B)-C(4B)   | 114.68(19) |
| O(2A)-C(11A)-C(12A)  | 105.18(18) |
| O(2A)-C(11A)-H(11A)  | 110.7      |
| C(12A)-C(11A)-H(11A) | 110.7      |
| O(2A)-C(11A)-H(11B)  | 110.7      |
| C(12A)-C(11A)-H(11B) | 110.7      |
| H(11A)-C(11A)-H(11B) | 108.8      |
| O(2B)-C(11B)-C(12B)  | 105.13(16) |
| O(2B)-C(11B)-H(11C)  | 110.7      |
| C(12B)-C(11B)-H(11C) | 110.7      |
| O(2B)-C(11B)-H(11D)  | 110.7      |
| C(12B)-C(11B)-H(11D) | 110.7      |
| H(11C)-C(11B)-H(11D) | 108.8      |
| N(4A)-C(12A)-C(13A)  | 112.4(2)   |
| N(4A)-C(12A)-C(11A)  | 103.3(2)   |
| C(13A)-C(12A)-C(11A) | 113.4(2)   |
| N(4A)-C(12A)-H(12A)  | 109.2      |
| C(13A)-C(12A)-H(12A) | 109.2      |
| C(11A)-C(12A)-H(12A) | 109.2      |
| N(4B)-C(12B)-C(13B)  | 110.04(19) |
| N(4B)-C(12B)-C(11B)  | 103.29(18) |
| C(13B)-C(12B)-C(11B) | 114.3(2)   |
| N(4B)-C(12B)-H(12B)  | 109.7      |

# Supplementary Material (ESI) for Chemical Communications  
# This journal is © The Royal Society of Chemistry 2005

|                      |            |
|----------------------|------------|
| C(13B)-C(12B)-H(12B) | 109.7      |
| C(11B)-C(12B)-H(12B) | 109.7      |
| C(12A)-C(13A)-H(13A) | 109.5      |
| C(12A)-C(13A)-H(13B) | 109.5      |
| H(13A)-C(13A)-H(13B) | 109.5      |
| C(12A)-C(13A)-H(13C) | 109.5      |
| H(13A)-C(13A)-H(13C) | 109.5      |
| H(13B)-C(13A)-H(13C) | 109.5      |
| C(12B)-C(13B)-H(13D) | 109.5      |
| C(12B)-C(13B)-H(13E) | 109.5      |
| H(13D)-C(13B)-H(13E) | 109.5      |
| C(12B)-C(13B)-H(13F) | 109.5      |
| H(13D)-C(13B)-H(13F) | 109.5      |
| H(13E)-C(13B)-H(13F) | 109.5      |
| C(1A)-N(1A)-H(1A1)   | 121.3(17)  |
| C(1A)-N(1A)-H(1A2)   | 120.9(14)  |
| H(1A1)-N(1A)-H(1A2)  | 118(2)     |
| C(1B)-N(1B)-H(1B1)   | 120.5(17)  |
| C(1B)-N(1B)-H(1B2)   | 124.0(14)  |
| H(1B1)-N(1B)-H(1B2)  | 115(2)     |
| C(1C)-N(1C)-H(1C1)   | 122.6(16)  |
| C(3A)-N(2A)-C(4A)    | 114.75(18) |
| C(4B)-N(2B)-C(3B)    | 115.42(18) |
| C(3C)#1-N(2C)-C(3C)  | 114.8(3)   |
| C(6A)-N(3A)-C(8A)    | 107.1(2)   |
| C(6B)-N(3B)-C(8B)    | 106.8(2)   |
| C(4C)-N(3C)-C(6C)    | 107.19(19) |
| C(10A)-N(4A)-C(12A)  | 107.2(2)   |
| C(10B)-N(4B)-C(12B)  | 107.53(19) |
| C(6A)-O(1A)-C(7A)    | 105.22(18) |
| C(6B)-O(1B)-C(7B)    | 105.69(17) |
| C(4C)-O(1C)-C(5C)    | 105.37(18) |
| C(10A)-O(2A)-C(11A)  | 105.4(2)   |
| C(10B)-O(2B)-C(11B)  | 105.61(17) |

---

Symmetry transformations used to generate equivalent atoms:  
#1 -x+1,-y+2,z

# Supplementary Material (ESI) for Chemical Communications  
# This journal is © The Royal Society of Chemistry 2005

Anisotropic displacement parameters ( $\text{Å}^2 \times 10^3$ ) for Parquette 1274.

The anisotropic displacement factor exponent takes the form:

$$-2 \pi^2 [ h^2 a^{*2} U_{11} + \dots + 2 h k a^* b^* U_{12} ]$$

---

|        | U11   | U22   | U33   | U23   | U13    | U12    |
|--------|-------|-------|-------|-------|--------|--------|
| C(1A)  | 42(1) | 32(1) | 30(1) | 3(1)  | -3(1)  | -1(1)  |
| C(1B)  | 35(1) | 35(1) | 30(1) | 1(1)  | 1(1)   | 1(1)   |
| C(1C)  | 36(2) | 37(2) | 20(2) | 0     | 0      | -1(2)  |
| C(2A)  | 40(1) | 32(1) | 29(1) | 5(1)  | 4(1)   | -1(1)  |
| C(2B)  | 37(1) | 38(1) | 27(1) | 5(1)  | 3(1)   | -1(1)  |
| C(2C)  | 31(1) | 36(1) | 25(1) | -2(1) | 3(1)   | 2(1)   |
| C(3A)  | 30(1) | 26(1) | 32(1) | 0(1)  | 0(1)   | 1(1)   |
| C(3B)  | 29(1) | 29(1) | 29(1) | 2(1)  | -1(1)  | 0(1)   |
| C(3C)  | 28(1) | 29(1) | 24(1) | -1(1) | 1(1)   | 1(1)   |
| C(4A)  | 31(1) | 26(1) | 31(1) | 1(1)  | -3(1)  | 0(1)   |
| C(4B)  | 29(1) | 29(1) | 29(1) | -1(1) | -1(1)  | 0(1)   |
| C(4C)  | 26(1) | 29(1) | 30(1) | -5(1) | 2(1)   | 4(1)   |
| C(5A)  | 41(1) | 34(1) | 27(1) | -1(1) | -4(1)  | -3(1)  |
| C(5B)  | 36(1) | 36(1) | 27(1) | -3(1) | -4(1)  | -1(1)  |
| C(5C)  | 33(1) | 38(1) | 51(2) | 2(1)  | -4(1)  | 11(1)  |
| C(6A)  | 28(1) | 24(1) | 33(1) | 4(1)  | 2(1)   | -1(1)  |
| C(6B)  | 32(1) | 32(1) | 33(1) | 5(1)  | 1(1)   | -5(1)  |
| C(6C)  | 37(1) | 38(1) | 43(2) | -3(1) | -13(1) | 10(1)  |
| C(7A)  | 37(1) | 45(1) | 48(2) | -5(1) | 2(1)   | -11(1) |
| C(7B)  | 37(1) | 47(2) | 62(2) | -7(2) | -1(1)  | -14(1) |
| C(7C)  | 77(2) | 49(2) | 45(2) | 6(1)  | -6(2)  | 21(2)  |
| C(8A)  | 37(1) | 43(2) | 42(2) | 1(1)  | -6(1)  | -6(1)  |
| C(8B)  | 45(2) | 41(2) | 59(2) | 6(2)  | -20(1) | -13(1) |
| C(9A)  | 55(2) | 53(2) | 50(2) | -9(1) | 0(1)   | -10(1) |
| C(9B)  | 96(2) | 66(2) | 59(2) | -9(2) | -4(2)  | -41(2) |
| C(10A) | 29(1) | 28(1) | 36(2) | -2(1) | -1(1)  | 0(1)   |
| C(10B) | 31(1) | 28(1) | 29(1) | -5(1) | -1(1)  | -2(1)  |
| C(11A) | 38(1) | 53(2) | 64(2) | 13(2) | -6(2)  | -15(1) |
| C(11B) | 31(1) | 38(1) | 53(2) | 3(1)  | -2(1)  | -6(1)  |
| C(12A) | 36(1) | 45(2) | 55(2) | 1(2)  | 12(1)  | -8(1)  |
| C(12B) | 32(1) | 36(1) | 44(2) | -1(1) | 10(1)  | -5(1)  |
| C(13A) | 78(2) | 73(2) | 64(2) | 24(2) | -5(2)  | -37(2) |
| C(13B) | 57(2) | 45(2) | 45(2) | 2(2)  | 7(1)   | -5(1)  |
| N(1A)  | 60(2) | 63(2) | 26(1) | 3(1)  | -3(1)  | -21(1) |
| N(1B)  | 53(2) | 71(2) | 23(1) | -1(1) | 1(1)   | -13(1) |
| N(1C)  | 46(2) | 70(2) | 21(2) | 0     | 0      | 13(2)  |



# Supplementary Material (ESI) for Chemical Communications  
# This journal is © The Royal Society of Chemistry 2005

|       |       |       |       |       |       |        |
|-------|-------|-------|-------|-------|-------|--------|
| N(2A) | 33(1) | 31(1) | 29(1) | 2(1)  | 0(1)  | -3(1)  |
| N(2B) | 32(1) | 33(1) | 26(1) | -1(1) | 1(1)  | -4(1)  |
| N(2C) | 29(1) | 34(1) | 21(1) | 0     | 0     | 6(1)   |
| N(3A) | 38(1) | 38(1) | 32(1) | 1(1)  | -3(1) | -9(1)  |
| N(3B) | 41(1) | 41(1) | 37(1) | 5(1)  | -9(1) | -13(1) |
| N(3C) | 38(1) | 40(1) | 28(1) | 0(1)  | -5(1) | 13(1)  |
| N(4A) | 37(1) | 36(1) | 37(1) | 1(1)  | 4(1)  | -7(1)  |
| N(4B) | 37(1) | 38(1) | 32(1) | -2(1) | 3(1)  | -12(1) |
| O(1A) | 37(1) | 45(1) | 38(1) | 2(1)  | 4(1)  | -11(1) |
| O(1B) | 38(1) | 59(1) | 45(1) | -2(1) | 7(1)  | -18(1) |
| O(1C) | 37(1) | 57(1) | 36(1) | -3(1) | 4(1)  | 19(1)  |
| O(2A) | 38(1) | 55(1) | 43(1) | -2(1) | -6(1) | -13(1) |
| O(2B) | 36(1) | 48(1) | 38(1) | -5(1) | -3(1) | -15(1) |

---

# Supplementary Material (ESI) for Chemical Communications  
# This journal is © The Royal Society of Chemistry 2005

Hydrogen coordinates ( $\times 10^4$ ) and isotropic  
displacement parameters ( $\text{\AA}^2 \times 10^3$ ) for Parquette 1274

---

|        | x       | y        | z         | U(eq)  |
|--------|---------|----------|-----------|--------|
| H(2A)  | 7441    | 4271     | 7633      | 40     |
| H(2B)  | 5454    | 4291     | 8934      | 41     |
| H(2C)  | 5562    | 9352     | 1605      | 37     |
| H(5A)  | 8517    | 5744     | 7651      | 41     |
| H(5B)  | 6569    | 5616     | 8926      | 39     |
| H(5C1) | 6503    | 8473     | 5268      | 49     |
| H(5C2) | 6196    | 7594     | 5433      | 49     |
| H(6C)  | 6281    | 9046     | 7950      | 47     |
| H(7A1) | 6500    | 3562     | 3797      | 52     |
| H(7A2) | 6742    | 2583     | 3873      | 52     |
| H(7B1) | 4487    | 3502     | 5267      | 59     |
| H(7B2) | 4789    | 2610     | 5181      | 59     |
| H(7C1) | 5895    | 8110     | 9971      | 86     |
| H(7C2) | 6221    | 7456     | 8913      | 86     |
| H(7C3) | 5742    | 7468     | 8292      | 86     |
| H(8A)  | 6771    | 3826     | 1024      | 49     |
| H(8B)  | 4733    | 4061     | 2626      | 58     |
| H(9A1) | 7223    | 2809     | -484      | 79     |
| H(9A2) | 6877    | 2197     | 543       | 79     |
| H(9A3) | 7332    | 2295     | 1426      | 79     |
| H(9B1) | 5071    | 3046     | 591       | 111    |
| H(9B2) | 4726    | 2461     | 1686      | 111    |
| H(9B3) | 5206    | 2382     | 2267      | 111    |
| H(11A) | 9494    | 6463     | 3922      | 62     |
| H(11B) | 9210    | 7384     | 3941      | 62     |
| H(11C) | 7484    | 6559     | 5211      | 49     |
| H(11D) | 7182    | 7448     | 5055      | 49     |
| H(12A) | 9229    | 6002     | 1228      | 54     |
| H(12B) | 7267    | 6057     | 2462      | 45     |
| H(13A) | 8857    | 7073     | -594      | 108    |
| H(13B) | 9239    | 7588     | 392       | 108    |
| H(13C) | 8777    | 7712     | 1188      | 108    |
| H(13D) | 6831    | 6928     | 573       | 73     |
| H(13E) | 7114    | 7659     | 1674      | 73     |
| H(13F) | 6643    | 7478     | 2313      | 73     |
| H(1A1) | 8190(8) | 5293(18) | 10590(40) | 69(9)* |
| H(1A2) | 7742(7) | 4714(17) | 10630(30) | 58(8)* |

# Supplementary Material (ESI) for Chemical Communications  
# This journal is © The Royal Society of Chemistry 2005

|        |         |           |           |        |
|--------|---------|-----------|-----------|--------|
| H(1B1) | 6238(9) | 5231(19)  | 11900(40) | 73(9)* |
| H(1B2) | 5775(7) | 4657(16)  | 12020(40) | 53(8)* |
| H(1C1) | 4779(7) | 10255(18) | -1390(40) | 65(9)* |

\*Refined isotropically

# Supplementary Material (ESI) for Chemical Communications  
# This journal is © The Royal Society of Chemistry 2005

### **Crystallographic Data for Ampybox 2.**

The data collection crystal was a colorless rectangular block, cut from a very thick plate. Examination of the diffraction pattern on a Nonius Kappa CCD diffractometer indicated a monoclinic crystal system. All work was done at 150 K using an Oxford Cryosystems Cryostream Cooler. The data collection strategy was set up to measure a quadrant of reciprocal space with a redundancy factor of 3.2, which means that 90% of the reflections were measured at least 3.2 times. A combination of phi and omega scans with a frame width of 1.0° was used. Data integration was done with Denzo(1), and scaling and merging of the data was done with Scalepack(1). Merging the data and averaging the symmetry equivalent reflections resulted in an Rint value of 0.035.

The structure was solved by the direct methods procedure in SHELXS-97(2). There are 2 molecules in the asymmetric unit, and they are labeled as molecules A and B. The correct enantiomer was chosen based on the known chiral centers. Full-matrix least-squares refinements based on  $F^2$  were performed in SHELXL-97(3), as incorporated in the WinGX package(4).

The hydrogen atoms bonded to the nitrogen atoms were refined isotropically. For the methyl groups, the hydrogen atoms were added at calculated positions using a riding model with  $U(H) = 1.5 * U_{eq}(\text{bonded carbon atom})$ . The torsion angle, which defines the orientation of the methyl group about the C-C bond, was refined. The remaining hydrogen atoms were included in the model at calculated positions using a riding model with  $U(H) = 1.2 * U_{eq}(\text{attached atom})$ . The final refinement cycle was based on all 4105 intensities and 439 variables and resulted in agreement factors of  $R1(F) = 0.042$  and  $wR2(F^2) = 0.083$ . For the subset of data with  $I > 2 * \sigma(I)$ , the  $R1(F)$  value is 0.034 for 3588 reflections. The final difference electron density map contains maximum and minimum peak heights of 0.17 and -0.18 e/Å<sup>3</sup>. Neutral atom scattering factors were used and include terms for anomalous dispersion(5).

# Supplementary Material (ESI) for Chemical Communications  
# This journal is © The Royal Society of Chemistry 2005

Table 1. Crystallographic details for Parquette 1286.

|                                   |                                                                        |
|-----------------------------------|------------------------------------------------------------------------|
| Empirical formula                 | C17 H24 N4 O2                                                          |
| Formula weight                    | 316.40                                                                 |
| Temperature                       | 150(2) K                                                               |
| Wavelength                        | 0.71073 Å                                                              |
| Crystal system                    | monoclinic                                                             |
| Space group                       | P2 <sub>1</sub>                                                        |
| Unit cell dimensions              | a = 6.131(1) Å<br>b = 13.950(2) Å<br>c = 20.220(3) Å<br>β = 91.021(4)° |
| Volume                            | 1729.1(5) Å <sup>3</sup>                                               |
| Z                                 | 4                                                                      |
| Density (calculated)              | 1.215 Mg/m <sup>3</sup>                                                |
| Absorption coefficient            | 0.082 mm <sup>-1</sup>                                                 |
| F(000)                            | 680                                                                    |
| Crystal size                      | 0.23 x 0.23 x 0.31 mm <sup>3</sup>                                     |
| Theta range for data collection   | 2.49 to 27.48°.                                                        |
| Index ranges                      | -7 ≤ h ≤ 7, -17 ≤ k ≤ 18, -26 ≤ l ≤ 26                                 |
| Reflections collected             | 27009                                                                  |
| Independent reflections           | 4105 [R(int) = 0.035]                                                  |
| Completeness to theta = 27.48°    | 99.9 %                                                                 |
| Refinement method                 | Full-matrix least-squares on F <sup>2</sup>                            |
| Data / restraints / parameters    | 4105 / 1 / 439                                                         |
| Goodness-of-fit on F <sup>2</sup> | 1.075                                                                  |
| Final R indices [I > 2σ(I)]       | R1 = 0.0339, wR2 = 0.0791                                              |
| R indices (all data)              | R1 = 0.0424, wR2 = 0.0827                                              |
| Largest diff. peak and hole       | 0.174 and -0.182 e/Å <sup>3</sup>                                      |

Table 2. Atomic coordinates ( $\times 10^4$ ) and equivalent isotropic displacement parameters ( $\text{\AA}^2 \times 10^3$ ) for Parquette 1286.  $U(\text{eq})$  is defined as one third of the trace of the orthogonalized  $U_{ij}$  tensor.

|        | x        | y        | z       | $U(\text{eq})$ |
|--------|----------|----------|---------|----------------|
| N(1A)  | 10926(3) | 4509(1)  | 5386(1) | 29(1)          |
| N(2A)  | 9647(2)  | 1640(1)  | 4899(1) | 21(1)          |
| N(3A)  | 5918(2)  | 755(1)   | 5433(1) | 25(1)          |
| N(4A)  | 12572(2) | 704(1)   | 4054(1) | 24(1)          |
| O(1A)  | 5265(2)  | 2106(1)  | 6015(1) | 28(1)          |
| O(2A)  | 14611(2) | 2048(1)  | 4016(1) | 27(1)          |
| C(1A)  | 10503(3) | 3586(1)  | 5234(1) | 22(1)          |
| C(2A)  | 11861(3) | 3065(1)  | 4812(1) | 22(1)          |
| C(3A)  | 11366(3) | 2125(1)  | 4663(1) | 20(1)          |
| C(4A)  | 8378(3)  | 2138(1)  | 5313(1) | 20(1)          |
| C(5A)  | 8718(3)  | 3088(1)  | 5491(1) | 22(1)          |
| C(6A)  | 6492(3)  | 1602(1)  | 5582(1) | 21(1)          |
| C(7A)  | 3527(3)  | 1465(1)  | 6207(1) | 26(1)          |
| C(8A)  | 3844(3)  | 559(1)   | 5782(1) | 23(1)          |
| C(9A)  | 3860(3)  | -389(1)  | 6152(1) | 27(1)          |
| C(10A) | 1620(3)  | -576(2)  | 6443(1) | 37(1)          |
| C(11A) | 5644(3)  | -468(2)  | 6679(1) | 43(1)          |
| C(12A) | 12826(3) | 1570(1)  | 4229(1) | 20(1)          |
| C(13A) | 15887(3) | 1344(1)  | 3659(1) | 28(1)          |
| C(14A) | 14432(3) | 444(1)   | 3638(1) | 26(1)          |
| C(15A) | 13651(3) | 132(2)   | 2948(1) | 32(1)          |
| C(16A) | 15577(4) | -220(2)  | 2546(1) | 47(1)          |
| C(17A) | 12394(4) | 918(2)   | 2587(1) | 48(1)          |
| N(1B)  | 4028(3)  | 12388(1) | -1(1)   | 36(1)          |
| N(2B)  | 5692(2)  | 9502(1)  | 274(1)  | 21(1)          |
| N(3B)  | 2863(2)  | 8308(1)  | 960(1)  | 23(1)          |
| N(4B)  | 9431(2)  | 8817(1)  | -384(1) | 26(1)          |
| O(1B)  | 699(2)   | 9578(1)  | 1176(1) | 27(1)          |
| O(2B)  | 9983(2)  | 10304(1) | -788(1) | 28(1)          |

# Supplementary Material (ESI) for Chemical Communications  
# This journal is © The Royal Society of Chemistry 2005

|        |          |          |          |       |
|--------|----------|----------|----------|-------|
| C(6B)  | 2508(3)  | 9200(1)  | 899(1)   | 21(1) |
| C(3B)  | 6942(3)  | 10116(1) | -69(1)   | 21(1) |
| C(12B) | 8845(3)  | 9685(1)  | -405(1)  | 21(1) |
| C(5B)  | 3276(3)  | 10837(1) | 479(1)   | 23(1) |
| C(2B)  | 6483(3)  | 11078(1) | -151(1)  | 24(1) |
| C(4B)  | 3900(3)  | 9888(1)  | 540(1)   | 20(1) |
| C(13B) | 11762(3) | 9745(1)  | -1054(1) | 27(1) |
| C(1B)  | 4564(3)  | 11468(1) | 112(1)   | 24(1) |
| C(8B)  | 1091(3)  | 7911(1)  | 1368(1)  | 25(1) |
| C(14B) | 11272(3) | 8711(2)  | -843(1)  | 27(1) |
| C(9B)  | 2020(3)  | 7505(2)  | 2019(1)  | 32(1) |
| C(15B) | 10621(4) | 8032(2)  | -1410(1) | 37(1) |
| C(10B) | 219(4)   | 7060(2)  | 2431(1)  | 50(1) |
| C(7B)  | -469(3)  | 8765(2)  | 1453(1)  | 32(1) |
| C(11B) | 3806(4)  | 6763(2)  | 1893(1)  | 46(1) |
| C(16B) | 12608(4) | 7781(2)  | -1823(1) | 52(1) |
| C(17B) | 8756(4)  | 8437(2)  | -1839(1) | 55(1) |

---

Table 3. Bond lengths [Å] and angles [°] for Parquette 1286.

---

|               |          |
|---------------|----------|
| N(1A)-C(1A)   | 1.348(2) |
| N(1A)-H(1NA)  | 0.84(2)  |
| N(1A)-H(2NA)  | 0.87(2)  |
| N(2A)-C(4A)   | 1.346(2) |
| N(2A)-C(3A)   | 1.347(2) |
| N(3A)-C(6A)   | 1.267(3) |
| N(3A)-C(8A)   | 1.491(2) |
| N(4A)-C(12A)  | 1.269(2) |
| N(4A)-C(14A)  | 1.475(2) |
| O(1A)-C(6A)   | 1.360(2) |
| O(1A)-C(7A)   | 1.449(2) |
| O(2A)-C(12A)  | 1.358(2) |
| O(2A)-C(13A)  | 1.455(2) |
| C(1A)-C(5A)   | 1.404(3) |
| C(1A)-C(2A)   | 1.406(2) |
| C(2A)-C(3A)   | 1.379(3) |
| C(2A)-H(2A)   | 0.9500   |
| C(3A)-C(12A)  | 1.483(2) |
| C(4A)-C(5A)   | 1.389(3) |
| C(4A)-C(6A)   | 1.488(2) |
| C(5A)-H(5A)   | 0.9500   |
| C(7A)-C(8A)   | 1.542(3) |
| C(7A)-H(7A1)  | 0.9900   |
| C(7A)-H(7A2)  | 0.9900   |
| C(8A)-C(9A)   | 1.520(3) |
| C(8A)-H(8A)   | 1.0000   |
| C(9A)-C(11A)  | 1.517(3) |
| C(9A)-C(10A)  | 1.526(3) |
| C(9A)-H(9A)   | 1.0000   |
| C(10A)-H(10A) | 0.9800   |
| C(10A)-H(10B) | 0.9800   |
| C(10A)-H(10C) | 0.9800   |
| C(11A)-H(11A) | 0.9800   |



# Supplementary Material (ESI) for Chemical Communications  
# This journal is © The Royal Society of Chemistry 2005

|               |          |
|---------------|----------|
| C(11A)-H(11B) | 0.9800   |
| C(11A)-H(11C) | 0.9800   |
| C(13A)-C(14A) | 1.540(3) |
| C(13A)-H(13A) | 0.9900   |
| C(13A)-H(13B) | 0.9900   |
| C(14A)-C(15A) | 1.529(3) |
| C(14A)-H(14A) | 1.0000   |
| C(15A)-C(17A) | 1.520(3) |
| C(15A)-C(16A) | 1.527(3) |
| C(15A)-H(15A) | 1.0000   |
| C(16A)-H(16A) | 0.9800   |
| C(16A)-H(16B) | 0.9800   |
| C(16A)-H(16C) | 0.9800   |
| C(17A)-H(17A) | 0.9800   |
| C(17A)-H(17B) | 0.9800   |
| C(17A)-H(17C) | 0.9800   |
| N(1B)-C(1B)   | 1.344(3) |
| N(1B)-H(1NB)  | 0.84(2)  |
| N(1B)-H(2NB)  | 0.92(3)  |
| N(2B)-C(4B)   | 1.345(2) |
| N(2B)-C(3B)   | 1.350(2) |
| N(3B)-C(6B)   | 1.269(2) |
| N(3B)-C(8B)   | 1.483(2) |
| N(4B)-C(12B)  | 1.262(3) |
| N(4B)-C(14B)  | 1.482(2) |
| O(1B)-C(6B)   | 1.358(2) |
| O(1B)-C(7B)   | 1.458(2) |
| O(2B)-C(12B)  | 1.362(2) |
| O(2B)-C(13B)  | 1.452(2) |
| C(6B)-C(4B)   | 1.484(2) |
| C(3B)-C(2B)   | 1.381(3) |
| C(3B)-C(12B)  | 1.487(2) |
| C(5B)-C(4B)   | 1.383(3) |
| C(5B)-C(1B)   | 1.403(3) |
| C(5B)-H(5B)   | 0.9500   |

# Supplementary Material (ESI) for Chemical Communications  
# This journal is © The Royal Society of Chemistry 2005

|                     |            |
|---------------------|------------|
| C(2B)-C(1B)         | 1.408(3)   |
| C(2B)-H(2B)         | 0.9500     |
| C(13B)-C(14B)       | 1.535(3)   |
| C(13B)-H(13C)       | 0.9900     |
| C(13B)-H(13D)       | 0.9900     |
| C(8B)-C(9B)         | 1.532(3)   |
| C(8B)-C(7B)         | 1.539(3)   |
| C(8B)-H(8B)         | 1.0000     |
| C(14B)-C(15B)       | 1.534(3)   |
| C(14B)-H(14B)       | 1.0000     |
| C(9B)-C(10B)        | 1.527(3)   |
| C(9B)-C(11B)        | 1.532(3)   |
| C(9B)-H(9B)         | 1.0000     |
| C(15B)-C(16B)       | 1.531(3)   |
| C(15B)-C(17B)       | 1.531(4)   |
| C(15B)-H(15B)       | 1.0000     |
| C(10B)-H(10D)       | 0.9800     |
| C(10B)-H(10E)       | 0.9800     |
| C(10B)-H(10F)       | 0.9800     |
| C(7B)-H(7B1)        | 0.9900     |
| C(7B)-H(7B2)        | 0.9900     |
| C(11B)-H(11D)       | 0.9800     |
| C(11B)-H(11E)       | 0.9800     |
| C(11B)-H(11F)       | 0.9800     |
| C(16B)-H(16D)       | 0.9800     |
| C(16B)-H(16E)       | 0.9800     |
| C(16B)-H(16F)       | 0.9800     |
| C(17B)-H(17D)       | 0.9800     |
| C(17B)-H(17E)       | 0.9800     |
| C(17B)-H(17F)       | 0.9800     |
| <br>                |            |
| C(1A)-N(1A)-H(1NA)  | 111.2(16)  |
| C(1A)-N(1A)-H(2NA)  | 117.4(15)  |
| H(1NA)-N(1A)-H(2NA) | 124(2)     |
| C(4A)-N(2A)-C(3A)   | 115.19(15) |

# Supplementary Material (ESI) for Chemical Communications  
# This journal is © The Royal Society of Chemistry 2005

|                     |            |
|---------------------|------------|
| C(6A)-N(3A)-C(8A)   | 107.08(15) |
| C(12A)-N(4A)-C(14A) | 107.50(15) |
| C(6A)-O(1A)-C(7A)   | 105.75(13) |
| C(12A)-O(2A)-C(13A) | 105.62(14) |
| N(1A)-C(1A)-C(5A)   | 122.42(17) |
| N(1A)-C(1A)-C(2A)   | 121.28(17) |
| C(5A)-C(1A)-C(2A)   | 116.29(16) |
| C(3A)-C(2A)-C(1A)   | 119.60(16) |
| C(3A)-C(2A)-H(2A)   | 120.2      |
| C(1A)-C(2A)-H(2A)   | 120.2      |
| N(2A)-C(3A)-C(2A)   | 124.86(16) |
| N(2A)-C(3A)-C(12A)  | 115.62(15) |
| C(2A)-C(3A)-C(12A)  | 119.49(16) |
| N(2A)-C(4A)-C(5A)   | 124.64(16) |
| N(2A)-C(4A)-C(6A)   | 115.42(15) |
| C(5A)-C(4A)-C(6A)   | 119.93(16) |
| C(4A)-C(5A)-C(1A)   | 119.40(16) |
| C(4A)-C(5A)-H(5A)   | 120.3      |
| C(1A)-C(5A)-H(5A)   | 120.3      |
| N(3A)-C(6A)-O(1A)   | 118.70(15) |
| N(3A)-C(6A)-C(4A)   | 126.57(16) |
| O(1A)-C(6A)-C(4A)   | 114.71(15) |
| O(1A)-C(7A)-C(8A)   | 104.83(13) |
| O(1A)-C(7A)-H(7A1)  | 110.8      |
| C(8A)-C(7A)-H(7A1)  | 110.8      |
| O(1A)-C(7A)-H(7A2)  | 110.8      |
| C(8A)-C(7A)-H(7A2)  | 110.8      |
| H(7A1)-C(7A)-H(7A2) | 108.9      |
| N(3A)-C(8A)-C(9A)   | 113.26(15) |
| N(3A)-C(8A)-C(7A)   | 103.33(14) |
| C(9A)-C(8A)-C(7A)   | 116.04(14) |
| N(3A)-C(8A)-H(8A)   | 107.9      |
| C(9A)-C(8A)-H(8A)   | 107.9      |
| C(7A)-C(8A)-H(8A)   | 107.9      |
| C(11A)-C(9A)-C(8A)  | 114.00(17) |

# Supplementary Material (ESI) for Chemical Communications  
# This journal is © The Royal Society of Chemistry 2005

|                      |            |
|----------------------|------------|
| C(11A)-C(9A)-C(10A)  | 111.09(16) |
| C(8A)-C(9A)-C(10A)   | 109.89(16) |
| C(11A)-C(9A)-H(9A)   | 107.2      |
| C(8A)-C(9A)-H(9A)    | 107.2      |
| C(10A)-C(9A)-H(9A)   | 107.2      |
| C(9A)-C(10A)-H(10A)  | 109.5      |
| C(9A)-C(10A)-H(10B)  | 109.5      |
| H(10A)-C(10A)-H(10B) | 109.5      |
| C(9A)-C(10A)-H(10C)  | 109.5      |
| H(10A)-C(10A)-H(10C) | 109.5      |
| H(10B)-C(10A)-H(10C) | 109.5      |
| C(9A)-C(11A)-H(11A)  | 109.5      |
| C(9A)-C(11A)-H(11B)  | 109.5      |
| H(11A)-C(11A)-H(11B) | 109.5      |
| C(9A)-C(11A)-H(11C)  | 109.5      |
| H(11A)-C(11A)-H(11C) | 109.5      |
| H(11B)-C(11A)-H(11C) | 109.5      |
| N(4A)-C(12A)-O(2A)   | 118.36(15) |
| N(4A)-C(12A)-C(3A)   | 126.14(16) |
| O(2A)-C(12A)-C(3A)   | 115.49(15) |
| O(2A)-C(13A)-C(14A)  | 104.35(13) |
| O(2A)-C(13A)-H(13A)  | 110.9      |
| C(14A)-C(13A)-H(13A) | 110.9      |
| O(2A)-C(13A)-H(13B)  | 110.9      |
| C(14A)-C(13A)-H(13B) | 110.9      |
| H(13A)-C(13A)-H(13B) | 108.9      |
| N(4A)-C(14A)-C(15A)  | 110.93(15) |
| N(4A)-C(14A)-C(13A)  | 103.74(14) |
| C(15A)-C(14A)-C(13A) | 115.41(16) |
| N(4A)-C(14A)-H(14A)  | 108.8      |
| C(15A)-C(14A)-H(14A) | 108.8      |
| C(13A)-C(14A)-H(14A) | 108.8      |
| C(17A)-C(15A)-C(16A) | 111.44(18) |
| C(17A)-C(15A)-C(14A) | 112.44(17) |
| C(16A)-C(15A)-C(14A) | 110.17(17) |

# Supplementary Material (ESI) for Chemical Communications  
# This journal is © The Royal Society of Chemistry 2005

|                      |            |
|----------------------|------------|
| C(17A)-C(15A)-H(15A) | 107.5      |
| C(16A)-C(15A)-H(15A) | 107.5      |
| C(14A)-C(15A)-H(15A) | 107.5      |
| C(15A)-C(16A)-H(16A) | 109.5      |
| C(15A)-C(16A)-H(16B) | 109.5      |
| H(16A)-C(16A)-H(16B) | 109.5      |
| C(15A)-C(16A)-H(16C) | 109.5      |
| H(16A)-C(16A)-H(16C) | 109.5      |
| H(16B)-C(16A)-H(16C) | 109.5      |
| C(15A)-C(17A)-H(17A) | 109.5      |
| C(15A)-C(17A)-H(17B) | 109.5      |
| H(17A)-C(17A)-H(17B) | 109.5      |
| C(15A)-C(17A)-H(17C) | 109.5      |
| H(17A)-C(17A)-H(17C) | 109.5      |
| H(17B)-C(17A)-H(17C) | 109.5      |
| C(1B)-N(1B)-H(1NB)   | 122.8(17)  |
| C(1B)-N(1B)-H(2NB)   | 121.1(15)  |
| H(1NB)-N(1B)-H(2NB)  | 116(2)     |
| C(4B)-N(2B)-C(3B)    | 115.26(15) |
| C(6B)-N(3B)-C(8B)    | 107.09(16) |
| C(12B)-N(4B)-C(14B)  | 107.11(15) |
| C(6B)-O(1B)-C(7B)    | 105.46(14) |
| C(12B)-O(2B)-C(13B)  | 105.42(13) |
| N(3B)-C(6B)-O(1B)    | 118.73(17) |
| N(3B)-C(6B)-C(4B)    | 125.68(16) |
| O(1B)-C(6B)-C(4B)    | 115.58(15) |
| N(2B)-C(3B)-C(2B)    | 124.17(16) |
| N(2B)-C(3B)-C(12B)   | 115.82(15) |
| C(2B)-C(3B)-C(12B)   | 119.92(16) |
| N(4B)-C(12B)-O(2B)   | 118.62(16) |
| N(4B)-C(12B)-C(3B)   | 126.66(16) |
| O(2B)-C(12B)-C(3B)   | 114.67(15) |
| C(4B)-C(5B)-C(1B)    | 119.34(16) |
| C(4B)-C(5B)-H(5B)    | 120.3      |
| C(1B)-C(5B)-H(5B)    | 120.3      |

# Supplementary Material (ESI) for Chemical Communications  
# This journal is © The Royal Society of Chemistry 2005

|                      |            |
|----------------------|------------|
| C(3B)-C(2B)-C(1B)    | 120.01(17) |
| C(3B)-C(2B)-H(2B)    | 120.0      |
| C(1B)-C(2B)-H(2B)    | 120.0      |
| N(2B)-C(4B)-C(5B)    | 125.09(16) |
| N(2B)-C(4B)-C(6B)    | 114.67(15) |
| C(5B)-C(4B)-C(6B)    | 120.20(15) |
| O(2B)-C(13B)-C(14B)  | 104.46(13) |
| O(2B)-C(13B)-H(13C)  | 110.9      |
| C(14B)-C(13B)-H(13C) | 110.9      |
| O(2B)-C(13B)-H(13D)  | 110.9      |
| C(14B)-C(13B)-H(13D) | 110.9      |
| H(13C)-C(13B)-H(13D) | 108.9      |
| N(1B)-C(1B)-C(5B)    | 123.41(18) |
| N(1B)-C(1B)-C(2B)    | 120.53(18) |
| C(5B)-C(1B)-C(2B)    | 116.05(17) |
| N(3B)-C(8B)-C(9B)    | 110.54(15) |
| N(3B)-C(8B)-C(7B)    | 103.66(14) |
| C(9B)-C(8B)-C(7B)    | 114.38(16) |
| N(3B)-C(8B)-H(8B)    | 109.4      |
| C(9B)-C(8B)-H(8B)    | 109.4      |
| C(7B)-C(8B)-H(8B)    | 109.4      |
| N(4B)-C(14B)-C(15B)  | 109.80(15) |
| N(4B)-C(14B)-C(13B)  | 103.60(15) |
| C(15B)-C(14B)-C(13B) | 114.94(16) |
| N(4B)-C(14B)-H(14B)  | 109.4      |
| C(15B)-C(14B)-H(14B) | 109.4      |
| C(13B)-C(14B)-H(14B) | 109.4      |
| C(10B)-C(9B)-C(11B)  | 109.95(18) |
| C(10B)-C(9B)-C(8B)   | 110.94(17) |
| C(11B)-C(9B)-C(8B)   | 111.32(16) |
| C(10B)-C(9B)-H(9B)   | 108.2      |
| C(11B)-C(9B)-H(9B)   | 108.2      |
| C(8B)-C(9B)-H(9B)    | 108.2      |
| C(16B)-C(15B)-C(17B) | 111.6(2)   |
| C(16B)-C(15B)-C(14B) | 110.49(18) |

# Supplementary Material (ESI) for Chemical Communications  
# This journal is © The Royal Society of Chemistry 2005

|                      |            |
|----------------------|------------|
| C(17B)-C(15B)-C(14B) | 112.19(18) |
| C(16B)-C(15B)-H(15B) | 107.4      |
| C(17B)-C(15B)-H(15B) | 107.4      |
| C(14B)-C(15B)-H(15B) | 107.4      |
| C(9B)-C(10B)-H(10D)  | 109.5      |
| C(9B)-C(10B)-H(10E)  | 109.5      |
| H(10D)-C(10B)-H(10E) | 109.5      |
| C(9B)-C(10B)-H(10F)  | 109.5      |
| H(10D)-C(10B)-H(10F) | 109.5      |
| H(10E)-C(10B)-H(10F) | 109.5      |
| O(1B)-C(7B)-C(8B)    | 104.40(14) |
| O(1B)-C(7B)-H(7B1)   | 110.9      |
| C(8B)-C(7B)-H(7B1)   | 110.9      |
| O(1B)-C(7B)-H(7B2)   | 110.9      |
| C(8B)-C(7B)-H(7B2)   | 110.9      |
| H(7B1)-C(7B)-H(7B2)  | 108.9      |
| C(9B)-C(11B)-H(11D)  | 109.5      |
| C(9B)-C(11B)-H(11E)  | 109.5      |
| H(11D)-C(11B)-H(11E) | 109.5      |
| C(9B)-C(11B)-H(11F)  | 109.5      |
| H(11D)-C(11B)-H(11F) | 109.5      |
| H(11E)-C(11B)-H(11F) | 109.5      |
| C(15B)-C(16B)-H(16D) | 109.5      |
| C(15B)-C(16B)-H(16E) | 109.5      |
| H(16D)-C(16B)-H(16E) | 109.5      |
| C(15B)-C(16B)-H(16F) | 109.5      |
| H(16D)-C(16B)-H(16F) | 109.5      |
| H(16E)-C(16B)-H(16F) | 109.5      |
| C(15B)-C(17B)-H(17D) | 109.5      |
| C(15B)-C(17B)-H(17E) | 109.5      |
| H(17D)-C(17B)-H(17E) | 109.5      |
| C(15B)-C(17B)-H(17F) | 109.5      |
| H(17D)-C(17B)-H(17F) | 109.5      |
| H(17E)-C(17B)-H(17F) | 109.5      |

---

# Supplementary Material (ESI) for Chemical Communications  
# This journal is © The Royal Society of Chemistry 2005

Symmetry transformations used to generate equivalent atoms:



Table 4. Anisotropic displacement parameters ( $\text{\AA}^2 \times 10^3$ ) for Parquette 1286. The anisotropic displacement factor exponent takes the form:  $-2\pi^2 [ h^2 a^{*2} U^{11} + \dots + 2 h k a^* b^* U^{12} ]$

|        | U11   | U22   | U33   | U23    | U13   | U12    |
|--------|-------|-------|-------|--------|-------|--------|
| N(1A)  | 30(1) | 17(1) | 41(1) | -2(1)  | 12(1) | -1(1)  |
| N(2A)  | 20(1) | 19(1) | 22(1) | 1(1)   | 3(1)  | 0(1)   |
| N(3A)  | 24(1) | 23(1) | 27(1) | 0(1)   | 9(1)  | -4(1)  |
| N(4A)  | 26(1) | 21(1) | 25(1) | -2(1)  | 7(1)  | 0(1)   |
| O(1A)  | 23(1) | 24(1) | 38(1) | -7(1)  | 12(1) | -3(1)  |
| O(2A)  | 24(1) | 23(1) | 35(1) | -5(1)  | 11(1) | -2(1)  |
| C(1A)  | 25(1) | 16(1) | 26(1) | 1(1)   | 0(1)  | 3(1)   |
| C(2A)  | 22(1) | 19(1) | 26(1) | 2(1)   | 5(1)  | -1(1)  |
| C(3A)  | 21(1) | 18(1) | 20(1) | 1(1)   | 1(1)  | 1(1)   |
| C(4A)  | 19(1) | 19(1) | 22(1) | 1(1)   | -1(1) | 0(1)   |
| C(5A)  | 22(1) | 20(1) | 25(1) | -2(1)  | 4(1)  | 3(1)   |
| C(6A)  | 20(1) | 23(1) | 19(1) | 1(1)   | 3(1)  | 2(1)   |
| C(7A)  | 22(1) | 28(1) | 27(1) | 0(1)   | 6(1)  | -1(1)  |
| C(8A)  | 19(1) | 26(1) | 24(1) | 0(1)   | 4(1)  | -2(1)  |
| C(9A)  | 27(1) | 24(1) | 32(1) | 1(1)   | 8(1)  | -2(1)  |
| C(10A) | 33(1) | 42(1) | 36(1) | 2(1)   | 10(1) | -10(1) |
| C(11A) | 33(1) | 47(1) | 49(1) | 16(1)  | -1(1) | 6(1)   |
| C(12A) | 19(1) | 20(1) | 21(1) | 3(1)   | 3(1)  | -1(1)  |
| C(13A) | 23(1) | 32(1) | 29(1) | -8(1)  | 8(1)  | -1(1)  |
| C(14A) | 25(1) | 23(1) | 28(1) | -3(1)  | 7(1)  | 2(1)   |
| C(15A) | 30(1) | 35(1) | 32(1) | -13(1) | 8(1)  | -5(1)  |
| C(16A) | 44(1) | 54(2) | 42(1) | -21(1) | 14(1) | -2(1)  |
| C(17A) | 46(1) | 64(2) | 34(1) | -6(1)  | -4(1) | 5(1)   |
| N(1B)  | 36(1) | 18(1) | 54(1) | 4(1)   | 18(1) | 3(1)   |
| N(2B)  | 21(1) | 19(1) | 24(1) | 1(1)   | 3(1)  | 1(1)   |
| N(3B)  | 25(1) | 21(1) | 25(1) | 4(1)   | 8(1)  | -1(1)  |
| N(4B)  | 26(1) | 23(1) | 29(1) | 0(1)   | 7(1)  | 1(1)   |
| O(1B)  | 27(1) | 21(1) | 33(1) | -1(1)  | 12(1) | 1(1)   |
| O(2B)  | 23(1) | 24(1) | 38(1) | 4(1)   | 10(1) | -1(1)  |
| C(6B)  | 23(1) | 22(1) | 19(1) | -2(1)  | 3(1)  | 2(1)   |

# Supplementary Material (ESI) for Chemical Communications  
# This journal is © The Royal Society of Chemistry 2005

|        |       |       |       |        |       |        |
|--------|-------|-------|-------|--------|-------|--------|
| C(3B)  | 20(1) | 20(1) | 24(1) | 0(1)   | 1(1)  | -2(1)  |
| C(12B) | 20(1) | 20(1) | 24(1) | 1(1)   | 1(1)  | -4(1)  |
| C(5B)  | 24(1) | 20(1) | 25(1) | -4(1)  | 6(1)  | 2(1)   |
| C(2B)  | 23(1) | 20(1) | 29(1) | 2(1)   | 4(1)  | -3(1)  |
| C(4B)  | 22(1) | 20(1) | 19(1) | -2(1)  | 2(1)  | 0(1)   |
| C(13B) | 20(1) | 30(1) | 30(1) | -2(1)  | 8(1)  | -1(1)  |
| C(1B)  | 28(1) | 17(1) | 29(1) | -2(1)  | 3(1)  | -1(1)  |
| C(8B)  | 26(1) | 23(1) | 26(1) | 2(1)   | 6(1)  | -3(1)  |
| C(14B) | 21(1) | 28(1) | 31(1) | 2(1)   | 6(1)  | 2(1)   |
| C(9B)  | 39(1) | 31(1) | 27(1) | 4(1)   | 2(1)  | -8(1)  |
| C(15B) | 39(1) | 29(1) | 44(1) | -11(1) | 15(1) | -5(1)  |
| C(10B) | 58(2) | 52(2) | 40(1) | 19(1)  | 14(1) | -7(1)  |
| C(7B)  | 31(1) | 29(1) | 37(1) | 5(1)   | 14(1) | -1(1)  |
| C(11B) | 46(1) | 51(2) | 40(1) | 17(1)  | -4(1) | 5(1)   |
| C(16B) | 54(2) | 52(2) | 51(2) | -17(1) | 21(1) | 4(1)   |
| C(17B) | 38(1) | 76(2) | 50(1) | -24(1) | -5(1) | -11(1) |

---

Table 5. Hydrogen coordinates ( $\times 10^4$ ) and isotropic displacement parameters ( $\text{\AA}^2 \times 10^3$ ) for Parquette 1286.

|        | x         | y         | z        | U(eq) |
|--------|-----------|-----------|----------|-------|
| H(1NA) | 11820(40) | 4748(17)  | 5125(11) | 37(6) |
| H(2NA) | 9910(40)  | 4830(17)  | 5581(10) | 35(6) |
| H(2A)  | 13112     | 3359      | 4630     | 27    |
| H(5A)  | 7751      | 3399      | 5784     | 27    |
| H(7A1) | 2082      | 1758      | 6115     | 31    |
| H(7A2) | 3644      | 1309      | 6684     | 31    |
| H(8A)  | 2637      | 537       | 5443     | 28    |
| H(9A)  | 4126      | -905      | 5820     | 33    |
| H(10A) | 1340      | -106      | 6792     | 55    |
| H(10B) | 1582      | -1223     | 6631     | 55    |
| H(10C) | 498       | -518      | 6094     | 55    |
| H(11A) | 7035      | -263      | 6494     | 64    |
| H(11B) | 5764      | -1135     | 6828     | 64    |
| H(11C) | 5285      | -57       | 7055     | 64    |
| H(13A) | 17284     | 1211      | 3894     | 33    |
| H(13B) | 16198     | 1571      | 3206     | 33    |
| H(14A) | 15243     | -99       | 3851     | 31    |
| H(15A) | 12637     | -422      | 3005     | 39    |
| H(16A) | 16596     | 311       | 2477     | 70    |
| H(16B) | 15046     | -458      | 2116     | 70    |
| H(16C) | 16325     | -738      | 2786     | 70    |
| H(17A) | 13355     | 1468      | 2516     | 72    |
| H(17B) | 11151     | 1117      | 2852     | 72    |
| H(17C) | 11864     | 675       | 2158     | 72    |
| H(1NB) | 2890(40)  | 12640(18) | 146(11)  | 35(6) |
| H(2NB) | 4830(40)  | 12765(19) | -283(11) | 41(7) |
| H(5B)  | 1989      | 11060     | 684      | 28    |
| H(2B)  | 7461      | 11477     | -384     | 29    |
| H(13C) | 13182     | 9961      | -868     | 32    |

# Supplementary Material (ESI) for Chemical Communications  
# This journal is © The Royal Society of Chemistry 2005

|        |       |      |       |    |
|--------|-------|------|-------|----|
| H(13D) | 11792 | 9799 | -1542 | 32 |
| H(8B)  | 323   | 7390 | 1117  | 30 |
| H(14B) | 12565 | 8442 | -598  | 32 |
| H(9B)  | 2682  | 8045 | 2278  | 39 |
| H(15B) | 10087 | 7424 | -1206 | 45 |
| H(10D) | -486  | 6541 | 2179  | 75 |
| H(10E) | -865  | 7550 | 2536  | 75 |
| H(10F) | 852   | 6801 | 2842  | 75 |
| H(7B1) | -1862 | 8654 | 1210  | 39 |
| H(7B2) | -779  | 8873 | 1926  | 39 |
| H(11D) | 3182  | 6220 | 1647  | 68 |
| H(11E) | 4411  | 6536 | 2317  | 68 |
| H(11F) | 4966  | 7056 | 1635  | 68 |
| H(16D) | 12177 | 7327 | -2171 | 78 |
| H(16E) | 13734 | 7489 | -1538 | 78 |
| H(16F) | 13186 | 8365 | -2024 | 78 |
| H(17D) | 9252  | 9018 | -2064 | 82 |
| H(17E) | 7518  | 8594 | -1559 | 82 |
| H(17F) | 8305  | 7959 | -2169 | 82 |

---
